# Supplementary material for: Large tandem chromosome expansions facilitate niche adaptation during persistent infection with drug-resistant Staphylococcus aureus
Source: PubMed Central journal article supplement (PMC5320569; doi:10.1099/mgen.0.000026), 2015-08-03
Supplement: mgen-01-26-s001.pdf [file mgen-01-26-s001.pdf]

**Table S1. Staphylococcus aureus strain and sequence data.**

| Strain ID number | Day of Infection | Source                | Seq platform   | Read type        | Read length | No. of read pairs | Seq Depth |
|------------------|------------------|-----------------------|----------------|------------------|-------------|-------------------|-----------|
| Sa_JKD6210       | 0                | Blood culture         |                | closed reference |             |                   |           |
| Sa_BPH1105       | 5                | Blood culture         | Illumina MiSeq | paired           | 250bp       | 619749            | 54.627    |
| Sa_BPH1106       | 5                | Blood culture         | Illumina MiSeq | paired           | 250bp       | 688303            | 60.978    |
| Sa_BPH1113       | 12               | Blood culture         | Illumina MiSeq | paired           | 250bp       | 560463            | 49.464    |
| Sa_BPH1115       | 14               | Blood culture         | Illumina MiSeq | paired           | 250bp       | 637561            | 60.269    |
| Sa_BPH1116       | 45               | Blood culture         | Illumina MiSeq | paired           | 250bp       | 640443            | 57.691    |
| Sa_BPH116G20     |                  | Laboratory subculture | Illumina MiSeq | paired           | 250bp       | 651688            | 105.067   |
| Sa_BPH1117       | 45               | Blood culture         | Illumina MiSeq | paired           | 250bp       | 1189751           | 120.769   |
| Sa_BPH1118       | 47               | Blood culture         | Illumina MiSeq | paired           | 250bp       | 1182627           | 119.927   |
| Sa_BPH1120       | 48               | Blood culture         | Illumina MiSeq | paired           | 250bp       | 1477806           | 150.865   |
| Sa_BPH1122       | 50               | Blood culture         | Illumina MiSeq | paired           | 250bp       | 611571            | 73.731    |
| Sa_BPH1123       | 50               | Blood culture         | Illumina MiSeq | paired           | 250bp       | 608334            | 49.627    |
| Sa_BPH1136       | 57               | Blood culture         | Illumina MiSeq | paired           | 250bp       | 543076            | 43.987    |
| Sa_BPH1141       | 61               | Blood culture         | Illumina MiSeq | paired           | 250bp       | 1342475           | 137.512   |
| Sa_BPH1142       | 113              | Blood culture         | Illumina MiSeq | paired           | 250bp       | 1320196           | 135.578   |
| Sa_BPH1143       | 113              | Blood culture         | Illumina MiSeq | paired           | 250bp       | 1281257           | 130.317   |
| Sa_BPH1146       | 113              | Blood culture         | Illumina MiSeq | paired           | 250bp       | 854649            | 67.843    |
| Sa_JKD6229       | 115              | Spinal Aspirate       |                | closed reference |             |                   |           |

**Table S2. Oligonucleotides used in this study**

| Oligo ID | Oligo sequence 5' – 3'                                  | Target      | Function                                         |
|----------|---------------------------------------------------------|-------------|--------------------------------------------------|
| P0092    | ACAGCAGGGCCTAGGGGACC                                    | SA1170      | qPCR                                             |
| P0093    | TGGCATGCATTTCGACGTTCTGGT                                |             |                                                  |
| P0100    | TCGCCATTCCAAGCATTGCGAT                                  | SA1190      | qPCR                                             |
| P0101    | ACACTGCACCTGGACCGCCT                                    |             |                                                  |
| P0094    | TGAAGCCGCAGGTCAAGGCG                                    | SA1204      | qPCR                                             |
| P0095    | TGCTAGTTGCACTTGCCACCT                                   |             |                                                  |
| P0096    | GCGAAAAATCGACGGCTTAGGTGC                                | SA1759      | qPCR                                             |
| P0097    | GGCGGTATACAGCCTGTCC                                     |             |                                                  |
| P0098    | TAATGCGCCGATGGGGTCGC                                    | SA1789      | qPCR                                             |
| P0099    | TGCTTTGTGTAAGACGTTGGCATGT                               |             |                                                  |
| P0102    | ACATCGGGCAACGCAGATTGT                                   | SA1801      | qPCR                                             |
| P0103    | TGTGTGACCGTCCGAATGTGTGA                                 |             |                                                  |
| P0088    | GGGGACAAGTTTGTACAAAAAAGCAGGCTTGGTGAGCTACTGCATTCAGCCCTAA | <i>alr1</i> | Allelic exchange                                 |
| P0089    | GGGGACCACTTTGTACAAGAAAGCTGGGTGCAGCCAAAATTGGTTGAGCGGA    | <i>alr1</i> |                                                  |
| P0072    | ACGCGACCAATAACTTCGCATTGA                                | <i>alr1</i> | Confirm mutation                                 |
| P0073    | TGTCAGAACTCAGCAGGCTCTCT                                 | <i>alr1</i> |                                                  |
| P0135    | TGGATCCCCTCGAGTTCATG                                    | <i>parC</i> | Confirm <i>parC</i> insertion in pRAB11          |
| P0136    | TGTAAAACGACGGCCAGTGA                                    |             |                                                  |
| P0133    | ATATGGTACCGAGGAGGAATTGGAAGTGAGTGAAATAATTCAAGATTATCACTTG | <i>parC</i> | Cloning gene in pRAB11 with incorporation of rbs |
| P0134    | ATATGAATTCCTTAGCTAATATACATGTCTATTACTTCACC               |             |                                                  |

**Table S3. Non-clinical *S. aureus* isolates used in this study**

| <b>Isolates ID</b> | <b>Description</b>                                                               |
|--------------------|----------------------------------------------------------------------------------|
| BPH1116G20         | The 20 <sup>th</sup> passage of BPH1116 in brain heart infusion broth            |
| BPH1201            | <i>S. aureus</i> JKD6229 with <i>alr1</i> mutation from <i>S. aureus</i> BPH1123 |
| BPH1221            | <i>E. coli</i> IM08B with pRAB11::parC <sub>WT</sub>                             |
| BPH1222            | <i>E. coli</i> IM08B with pRAB11::parC <sub>v480</sub>                           |
| BPH1223            | <i>E. coli</i> IM08B with pRAB11::parC <sub>v480,G296D</sub>                     |
| BPH1224            | <i>S. aureus</i> JKD6210 with pRAB11::parC <sub>WT</sub>                         |
| BPH1225            | <i>S. aureus</i> JKD6210 with pRAB11::parC <sub>WT</sub>                         |
| BPH1226            | <i>S. aureus</i> JKD6210 with pRAB11::parC <sub>v480</sub>                       |
| BPH1227            | <i>S. aureus</i> JKD6210 with pRAB11::parC <sub>v480,G296D</sub>                 |

# Figure S1

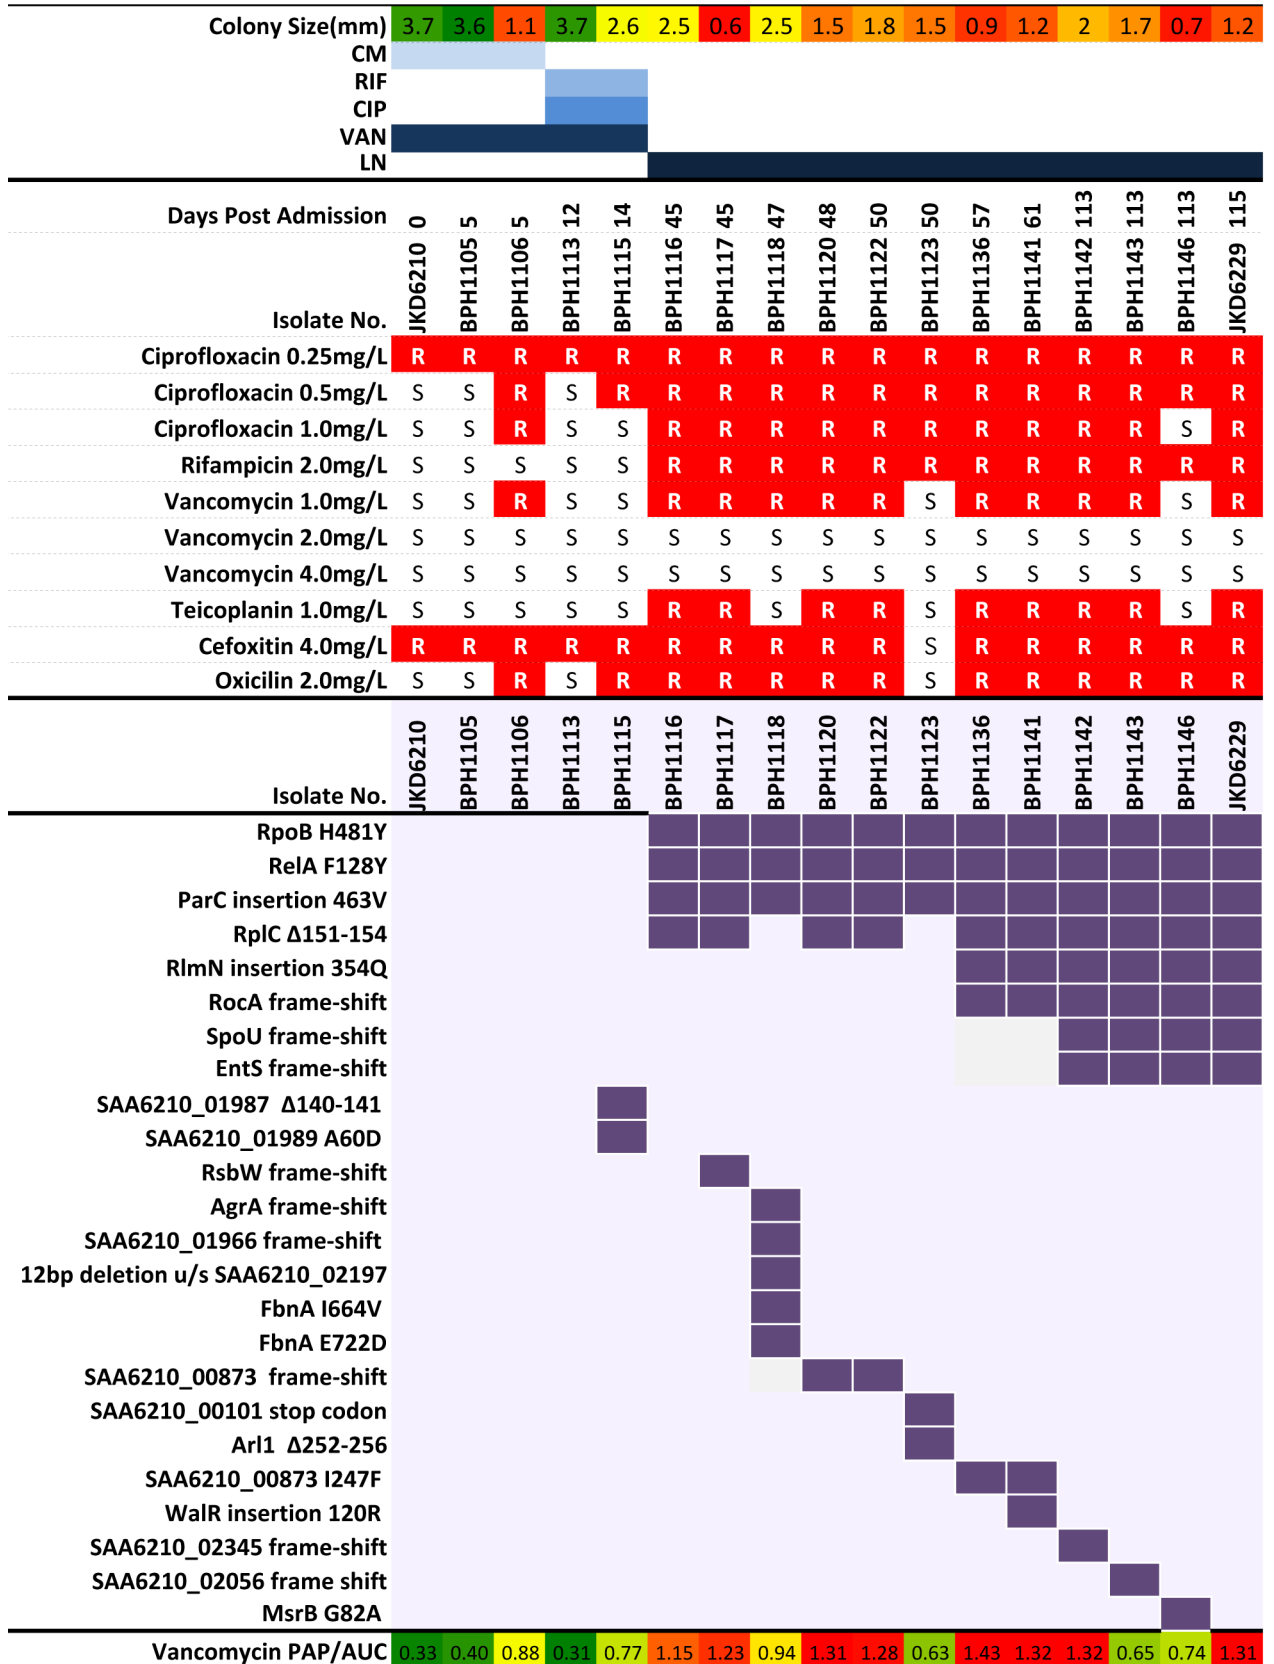

**Fig. S1: Phenotype and genotype diversity of isolates during persistent infection.** Complete list of functional SNPs and indels occurring across the 115 days of treatment among the 17 *S. aureus* isolates. Locus\_tag positions refer to the genome annotation of Sa\_JKD6210

Figure S2

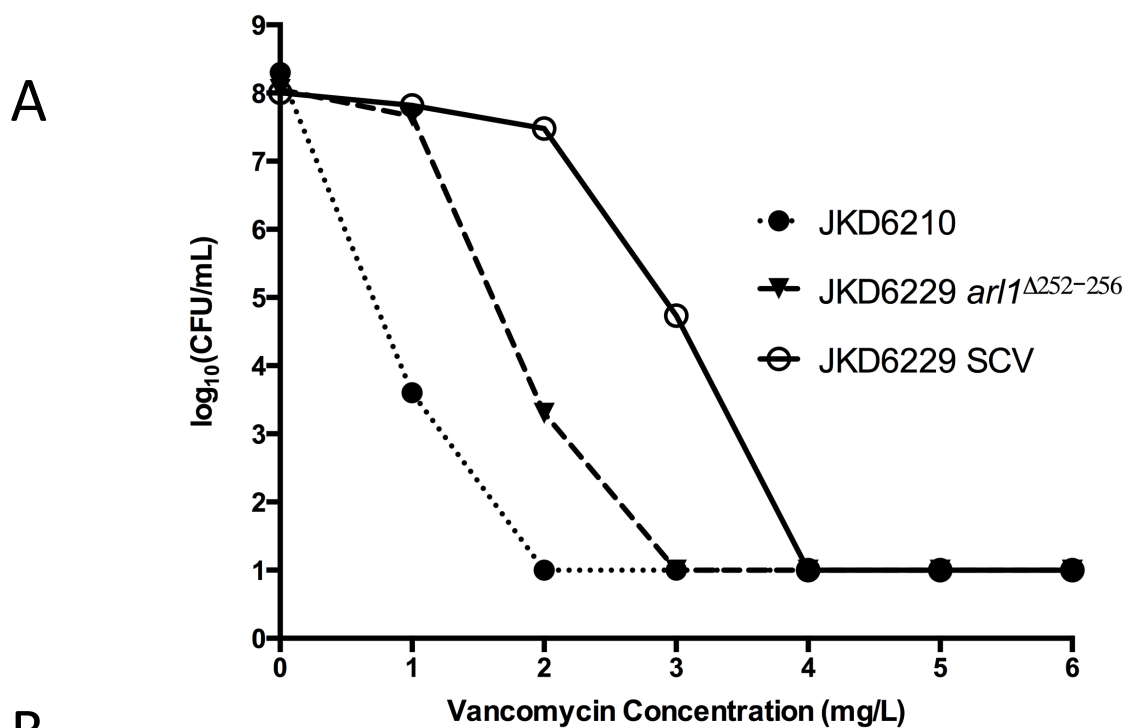

**Fig. S2: Functional analysis of *arl1* deletion observed only in Sa\_BPH1123.** The 5-codon deletion observed in *arl1* (encoding an alanine racemase) was introduced into JKD6229 by allelic exchange and the impact on antibiotic susceptibility was measured by (A) population analysis profile and (B) E-test, showing that the *arl1* mutation in Sa\_BPH1123 increased antibiotic susceptibility.

# Figure S3

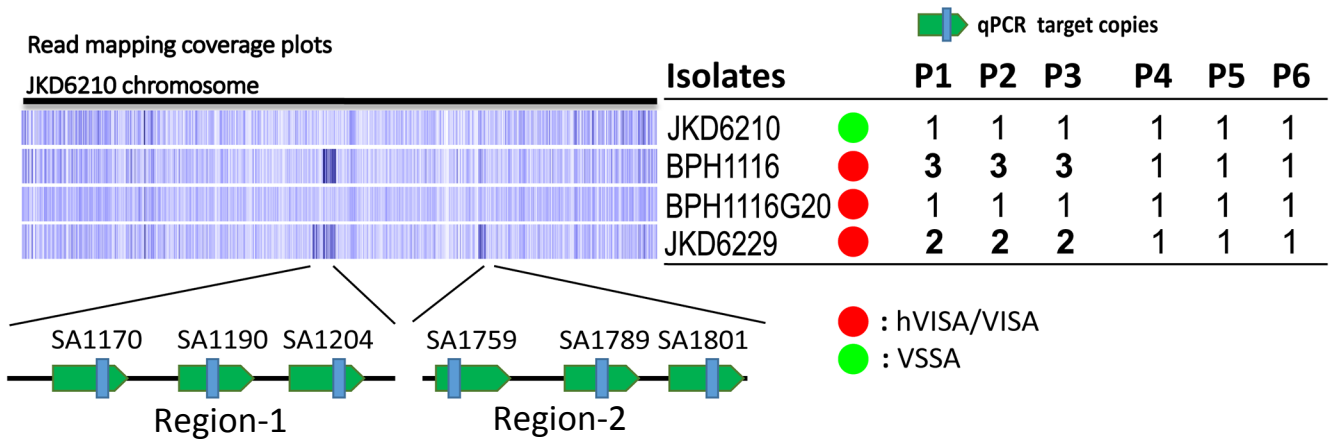

**Fig. S3: Assessment of chromosomal expansions on phenotype.** *S. aureus* isolate BPH1116 was subjected to 20 serial passages in the absence of antibiotic selection. Heatmap summary of sequence coverage and confirmatory qPCR shows the absence of the 3x 20kb repeats in BPH1116-G20 present in BPH1116. Depicted also are JKD6210 and JKD6229. As for Fig. 4 (main text) P1, P2 and P3 = Region 1 and P4, P5, P6 = Region 2 (phiSA03).
